# Supplementary material for: Extracellular Vesicle-Mediated Purinergic Signaling Contributes to Host Microenvironment Plasticity and Metastasis in Triple Negative Breast Cancer
Source: Int J Mol Sci. 2021 Jan 9;22(2):597. doi: 10.3390/ijms22020597 (PMC7827112; doi:10.3390/ijms22020597)
Supplement: Supplementary file 1 [file ijms-22-00597-s001.pdf]

## Supplementary Tables and Figures with Legends

**Supplementary Table S1.** Top 20 up-regulated lung proteins after MDA-MB-231 EV treatment. Mice were treated for three-weeks with MDA-MB-231 EVs or PBS vehicle and TMT-labeled lungs were submitted for mass spectrometry analysis. Significantly enriched proteins in MDA-MB-231 EV-treated lungs with raw p-values less than 0.05 were ranked by log2 fold-change.

| <b>Protein Name</b>                                               | <b>Gene Name</b> | <b>log2 FC</b> | <b>P Value</b> |
|-------------------------------------------------------------------|------------------|----------------|----------------|
| Alpha-1-antitrypsin 1-5                                           | Serpina1e        | 1.00           | 0.0404         |
| Interferon-inducible GTPase 1                                     | Iigp1            | 0.89           | 0.0110         |
| Glycoprotein Ib, beta polypeptide                                 | Gp1bb            | 0.83           | 0.0388         |
| Solute carrier family 2, facilitated glucose transporter member 3 | Slc2a3           | 0.77           | 0.0164         |
| Interferon-induced protein 44-like                                | Ifi44l           | 0.77           | 0.0021         |
| FYN-binding protein                                               | Fyb              | 0.76           | 0.0228         |
| Tubulin beta-1 chain                                              | Tubb1            | 0.72           | 0.0091         |
| Integrin alpha-Iib                                                | Itga2b           | 0.72           | 0.0083         |
| Integrin beta-3                                                   | Itgb3            | 0.71           | 0.0041         |
| C-type lectin domain family 1 member B                            | Clec1b           | 0.70           | 0.0035         |
| Lymphocyte cytosolic protein 2                                    | Lcp2             | 0.69           | 0.0027         |
| Thrombospondin 1                                                  | Thbs1            | 0.68           | 0.0048         |
| Bridging integrator 2                                             | Bin2             | 0.66           | 0.0067         |
| Metalloreductase STEAP4                                           | Steap4           | 0.64           | 0.0028         |
| Platelet glycoprotein IX                                          | Gp9              | 0.61           | 0.0344         |
| Fermitin family homolog 3                                         | Fermt3           | 0.58           | 0.0029         |
| Phospholipase D4                                                  | Pld4             | 0.58           | 0.0003         |
| DNA replication licensing factor MCM3                             | Mcm3             | 0.57           | 0.0226         |
| Multimerin-1                                                      | Mmrn1            | 0.56           | 0.0361         |
| DNA replication licensing factor MCM4                             | Mcm4             | 0.55           | 0.0238         |

**Supplementary Table S2.** Top 20 down-regulated lung proteins after MDA-MB-231 EV treatment. Mice were treated for three-weeks with MDA-MB-231 EVs or PBS vehicle and TMT-labeled lungs were submitted for mass spectrometry analysis. Significantly down-regulated proteins in MDA-MB-231 EV-treated lungs with raw p-values less than 0.05 were ranked by log2 fold-change.

| <b>Protein Name</b>                                       | <b>Gene Name</b> | <b>log2 FC</b> | <b>P Value</b> |
|-----------------------------------------------------------|------------------|----------------|----------------|
| Migration and invasion enhancer 1                         | Mien1            | -0.34          | 0.0047         |
| Stonin-1                                                  | Ston1            | -0.37          | 0.0254         |
| Polymeric immunoglobulin receptor                         | Pigr             | -0.32          | 0.0145         |
| PTB domain-containing engulfment adapter protein 1        | Gulp1            | -0.29          | 0.0006         |
| Voltage-dependent calcium channel subunit alpha-2/delta-1 | Cacna2d1         | -0.29          | 0.0139         |
| Carboxylic ester hydrolase                                | Ces2g            | -0.26          | 0.0021         |
| UPF0585 protein C16orf13 homolog                          |                  | -0.25          | 0.0193         |
| CD82 antigen                                              | Cd82             | -0.25          | 0.0408         |
| Hepatocyte growth factor activator                        | Hgfac            | -0.24          | 0.0357         |
| Alkaline phosphatase, tissue-nonspecific isozyme          | Alpl             | -0.24          | 0.0573         |
| Tumor-associated calcium signal transducer 2              | Tacstd2          | -0.23          | 0.0040         |
| CDP-diacylglycerol--inositol 3-phosphatidyltransferase    | Cdipt            | -0.23          | 0.0085         |
| Annexin A9                                                | Anxa9            | -0.23          | 0.0225         |
| Angiotensin-converting enzyme                             | Ace              | -0.23          | 0.0595         |
| Septin-5                                                  | Sept5            | -0.22          | 0.0164         |
| Heat shock protein beta-8                                 | Hspb8            | -0.22          | 0.0626         |
| Transforming growth factor beta receptor type 3           | Tgfbr3           | -0.22          | 0.0008         |
| Serine/threonine-protein phosphatase 2A                   | Ppp2r5c          | -0.22          | 0.0259         |
| Epoxide hydrolase 1                                       | Ephx1            | -0.21          | 0.0046         |
| Claudin-5                                                 | Cldn5            | -0.21          | 0.0031         |

**Supplementary Table S3.** Top 20 proteins with greatest fold enrichment in MDA-MB-231 EVs. Significantly enriched proteins in MDA-MB-231 EVs with adjusted p-values less than 0.01 were ranked by log2 fold-change.

| <b>Protein Name</b>                           | <b>Gene Name</b> | <b>log2 FC</b> | <b>P Value</b> |
|-----------------------------------------------|------------------|----------------|----------------|
| Thrombospondin-1                              | THBS1            | 7.1            | 9E-05          |
| Complement C4-A                               | C4A              | 5.4            | 9E-05          |
| Insulin-like growth factor-binding protein 4  | IGFBP4           | 5.2            | 9E-05          |
| Protein CYR61                                 | CYR61            | 4.9            | 9E-05          |
| Tissue-type plasminogen activator             | PLAT             | 4.6            | 9E-05          |
| Connective tissue growth factor               | CTGF             | 4.2            | 9E-05          |
| Pentraxin-related protein PTX3                | PTX3             | 3.9            | 9E-05          |
| Sulphydryl oxidase 1                          | QSOX1            | 3.8            | 9E-05          |
| Transforming growth factor beta 1             | TGFB1            | 3.8            | 9E-05          |
| Neuropilin-1                                  | NRP1             | 3.8            | 9E-05          |
| Eukaryotic translation initiation factor 4B   | EIF4B            | 3.7            | 9E-05          |
| Integrin beta 1                               | ITGB1            | 3.7            | 9E-05          |
| Filamin-C                                     | FLNC             | 3.7            | 9E-05          |
| Threonine-tRNA ligase                         | TARS             | 3.6            | 9E-05          |
| Properdin                                     | CFP              | 3.5            | 9E-05          |
| Nucleosome assembly protein 1-like 1          | NAP1L1           | 3.5            | 3E-04          |
| Protein-lysine 6-oxidase                      | LOX              | 3.3            | 1E-04          |
| Insulin-like growth factor-binding protein 7  | IGFBP7           | 3.3            | 9E-05          |
| Dickkopf-related protein 1                    | DKK1             | 3.3            | 8E-04          |
| Protein-glutamine gamma-glutamyltransferase 2 | TGM2             | 3.2            | 3E-04          |

**Supplementary Table S4.** Top 20 proteins with greatest fold enrichment in MCF-12F EVs. Significantly enriched proteins in MCF-12F EVs with adjusted p-values less than 0.01 were ranked by log2 fold-change.

| <b>Protein Name</b>                                                               | <b>Gene Name</b> | <b>log2 FC</b> | <b>P Value</b> |
|-----------------------------------------------------------------------------------|------------------|----------------|----------------|
| Laminin subunit beta-3                                                            | LAMB3            | 6.5            | 9E-05          |
| Laminin subunit alpha-3                                                           | LAMA3            | 6.4            | 9E-05          |
| Laminin subunit gamma-2                                                           | LAMC2            | 6.4            | 9E-05          |
| Fibulin-1                                                                         | FBLN1            | 6.3            | 9E-05          |
| Sushi, von Willebrand factor type A, EGF and pentraxin domain-containing protein1 | SVEP1            | 6.0            | 9E-05          |
| Clusterin                                                                         | CLU              | 5.6            | 9E-05          |
| Complement C1s subcomponent                                                       | C1S              | 5.6            | 9E-05          |
| Mesothelin                                                                        | MSLN             | 5.2            | 9E-05          |
| Bone morphogenetic protein 1                                                      | BMP1             | 5.1            | 9E-05          |
| Latent-transforming growth factor beta-binding protein 1                          | LTBP4            | 4.8            | 9E-05          |
| Syntenin-1                                                                        | SDCBP            | 4.8            | 9E-05          |
| ADATS-like protein 4                                                              | ADAMTSL4         | 4.8            | 9E-05          |
| Secreted frizzled-related protein 1                                               | SFRP1            | 4.7            | 9E-05          |
| Keratin, type II cytoskeletal 17                                                  | KRT17            | 4.6            | 9E-05          |
| Aminopeptidase                                                                    | ANPEP            | 4.6            | 9E-05          |
| Procollagen-lysine, 2-oxoglutarate 5-dioxygenase 1                                | PLOD1            | 4.6            | 9E-05          |
| Heat shock protein beta-1                                                         | HSPB1            | 4.6            | 9E-05          |
| Glia-derived nexin                                                                | SERPINE2         | 4.5            | 9E-05          |
| CD109 antigen                                                                     | CD109            | 4.3            | 9E-05          |
| Tsukushin                                                                         | TSKU             | 4.2            | 5E-04          |

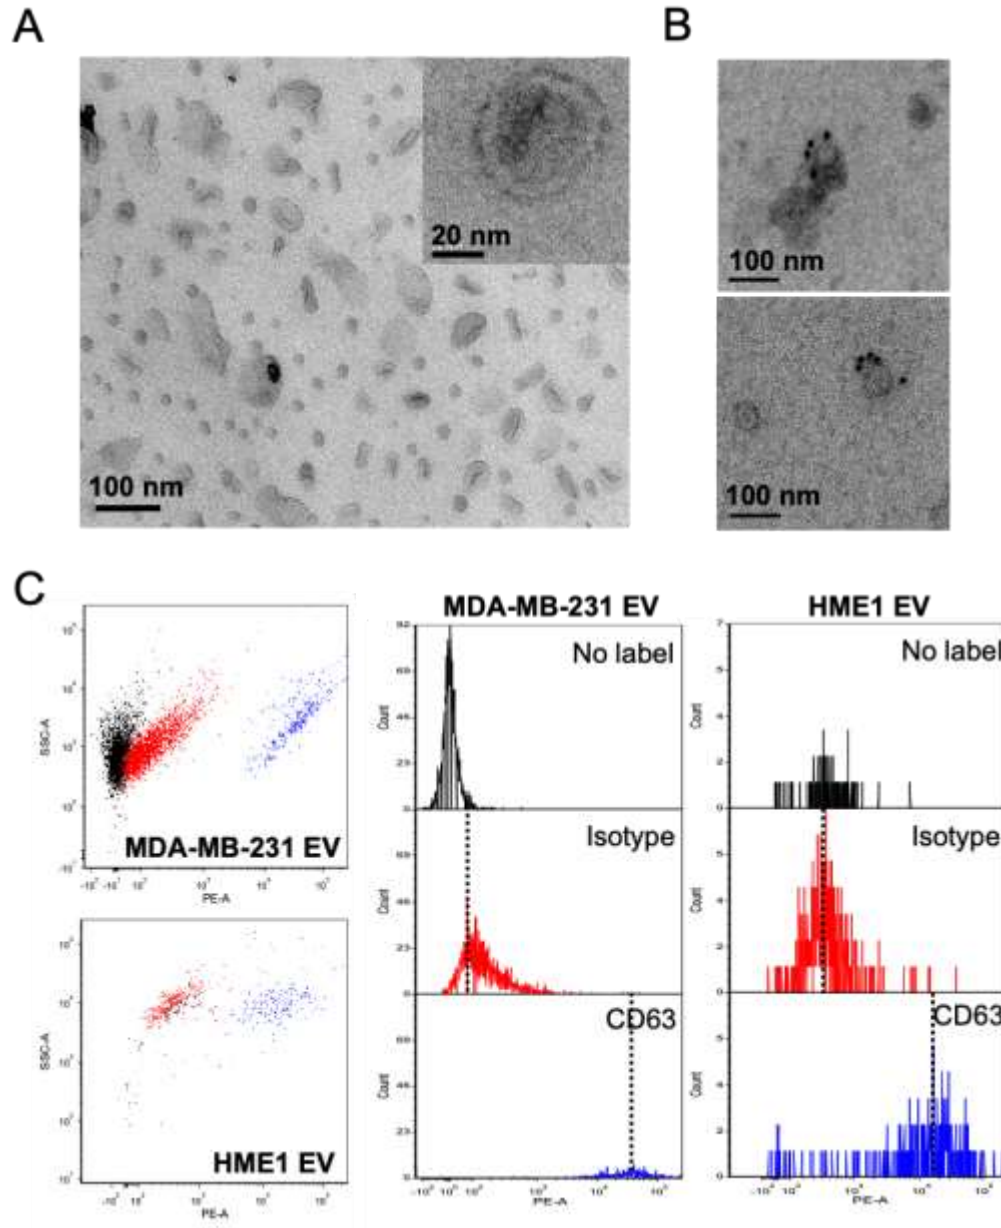

**Supplementary Figure S1.** Characterization of ExoQuick-TC-isolated HME1 and MDA-MB-231 EVs by TEM, CLSM, and flow cytometry. (A) TEM images of EVs isolated from MDA-MB-231 cells. Scale 20 and 100 nm. (B) MDA-MB-231 and HME1 EVs immuno-gold labeled for tetraspanins, respectively. Scale 100 nm. (C) Flow cytometry histogram plots comparing CD63 expression in MDA-MB-231 and HME1 EV populations.

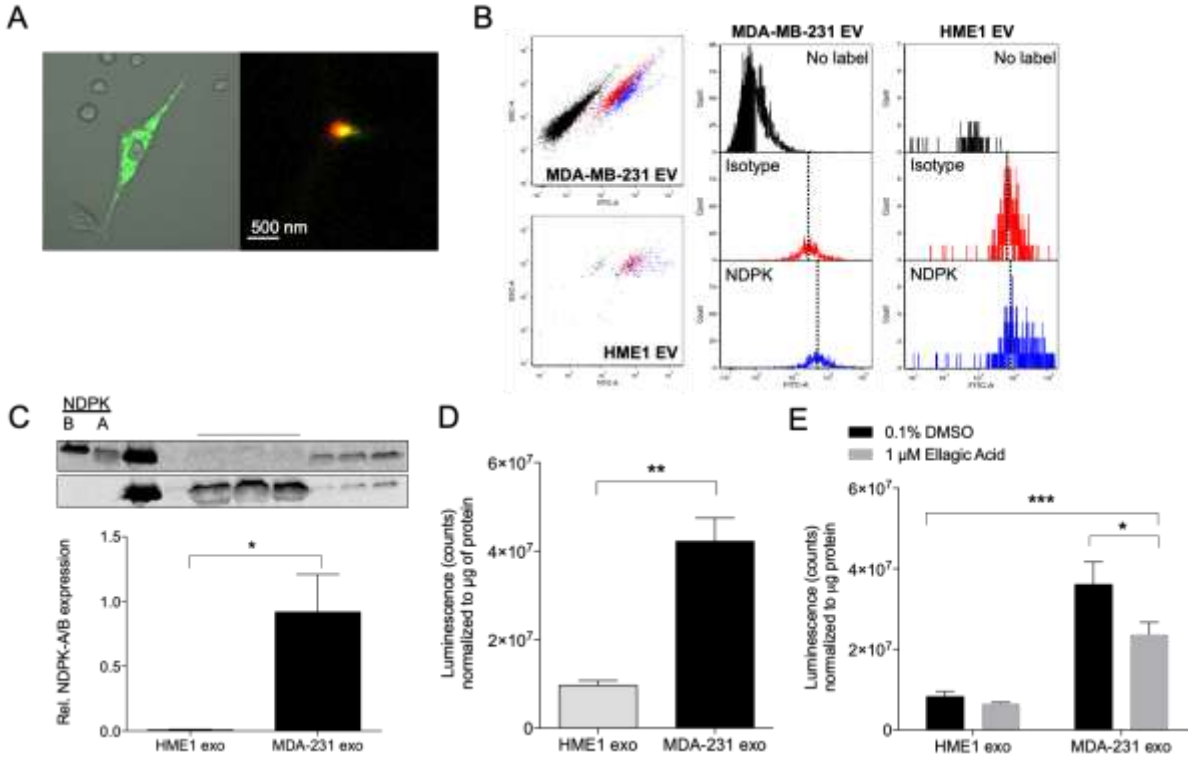

**Supplementary Figure S2.** MDA-MB-231 EVs isolated by ExoQuick-TC are enriched in NDPK-A/B expression and transphosphorylase activity. (A) Super-resolution image of a single MDA-MB-231-CD63-GFP expressing cell (left) and a representative MDA-MB-231 EV (right) immuno-stained for NDPK-B (red) expression. Scale 500 nm. (B) Flow cytometry analysis of MDA-MB-231 and HME1 EV populations immuno-labeled for NDPK-A expression. (C) Western blot analysis of lysed MDA-MB-231 and HME1 EVs and relative quantitation of NDPK-A/B expression. Recombinant NDPK-A, NDPK-B, and MDA-MB-231 cell lysate (CL) are also shown for comparison.  $n = 3$ . Mean  $\pm$  S.D. \* $p < 0.05$  by two-tailed Student's t-test. (D) Measurement of NDPK activity in MDA-MB-231 and HME1 EVs using an ATP transphosphorylase activity assay.  $n = 3$ . Mean  $\pm$  S.D. \* $p < 0.05$  by two-tailed Student's t-test. (E) Measurement of transphosphorylase activity in MDA-MB-231 and HME1 EVs treated with ellagic acid, an inhibitor of NDPK, or with DMSO vehicle.  $n = 3$ . Mean  $\pm$  S.D. \* $p < 0.05$ , \*\* $p < 0.01$ , \*\*\* $p < 0.001$  by two-way ANOVA.

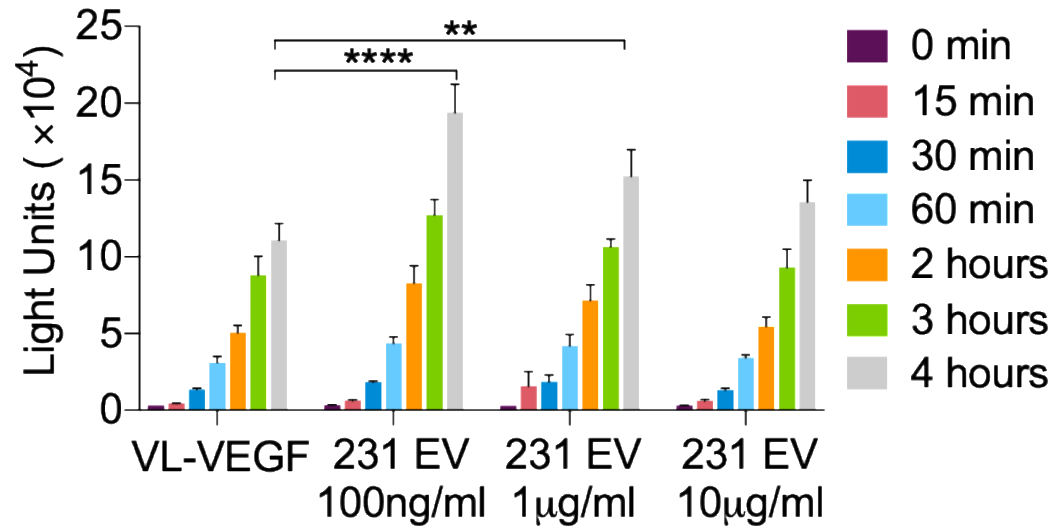

**Supplementary Figure S3.** The effect of varying MDA-MB-231 EV concentrations on endothelial monolayer permeabilization to FITC-dextran. HUVEC monolayers seeded in Matrigel-coated tranwell chambers were treated with MDA-MB-231 EVs in complete growth medium (VL-VEGF). Intensity of FITC-dextran permeabilization was measured at indicated time points as a measure of enhanced permeability.  $n = 3$ . Mean  $\pm$  S.E.M.  $**p < 0.01$  and  $***p < 0.001$  by one-way ANOVA and Tukey post-test.

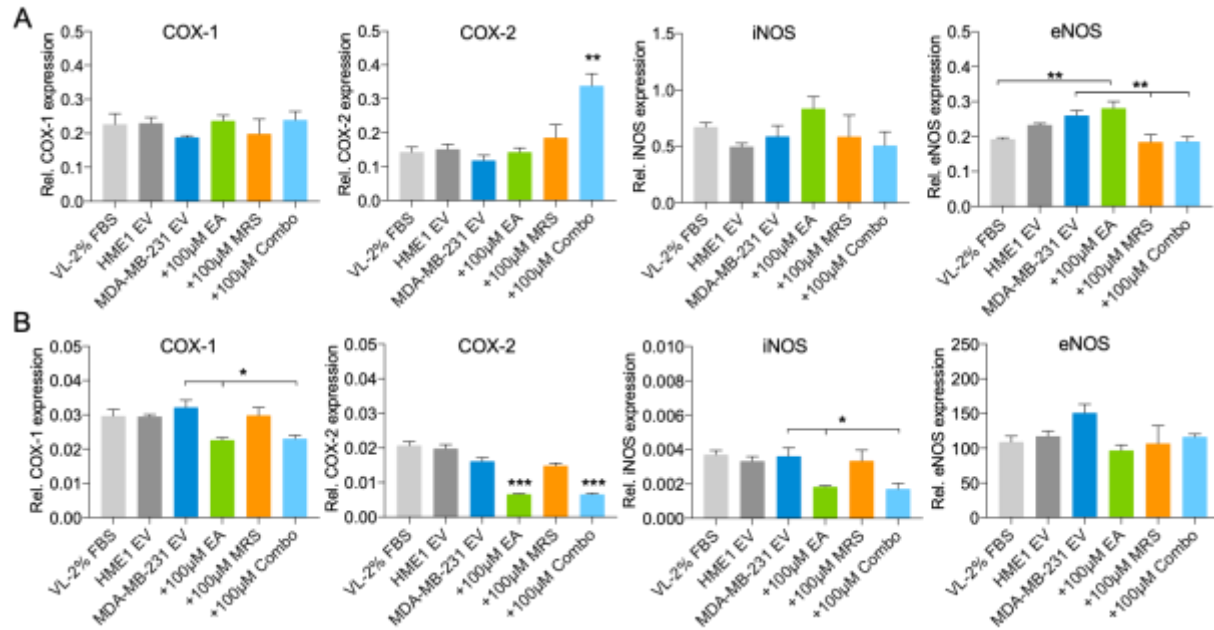

**Supplementary Figure S4.** Expression of COX-1, COX-2, iNOS, and eNOS in three- and 24-hour treated HUVECs. (A) Wes analysis of three-hour treated HUVECs with EVs (100 ng/ml) and high dose drug inhibitors (100  $\mu$ M EA, MRS2179, or both). (B) Western blot analysis of 24-hour treated HUVECs with EVs (100 ng/ml) and a lower dose of drug inhibitors (10  $\mu$ M EA, MRS2179, or both).  $n = 3$ . Mean  $\pm$  S.E.M. \* $p < 0.05$ , \*\* $p < 0.01$ , and \*\*\* $p < 0.001$  by one-way ANOVA and Tukey post-test.

## PBS

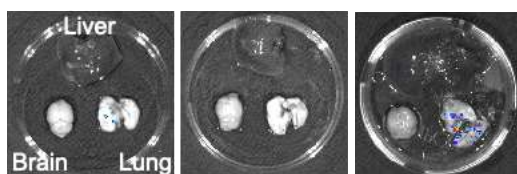

## MDA-MB-231 EV

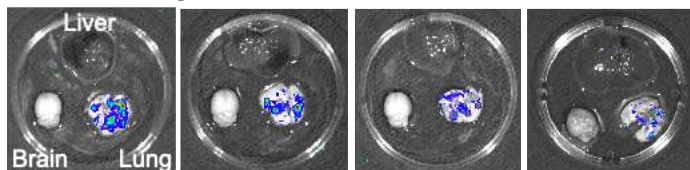

## MDA-MB-231 EV + MRS 2179

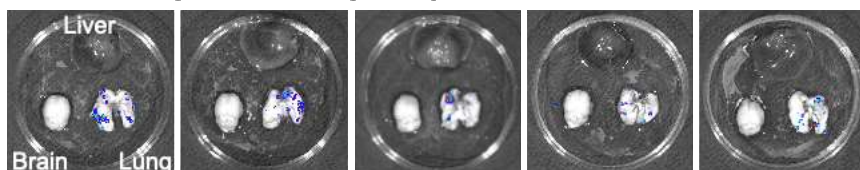

## MDA-MB-231 EV + EA

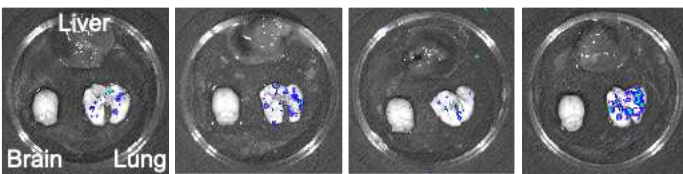

## MDA-MB-231 EV + COMBO

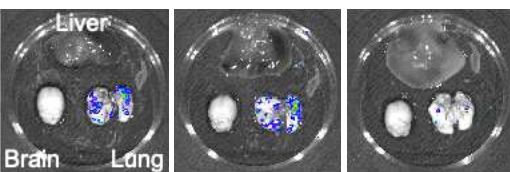

**Supplementary Figure S5.** Bioluminescence images of experimental metastases in brain, lung, and liver tissue from MDA-MB-231 EV treated mice. Mice were treated for eight weeks with vehicle, MDA-MB-231 EVs, or MDA-MB-231 EVs with the P2Y1 receptor antagonist MRS2179, the NDPK inhibitor ellagic acid (EA), or a combination of both drugs (Combo). Following treatment, MDA-MB-231-Luc<sup>+</sup> cells were injected by tail vein and development of metastases at select organs was evaluated by bioluminescence imaging 30 days later.

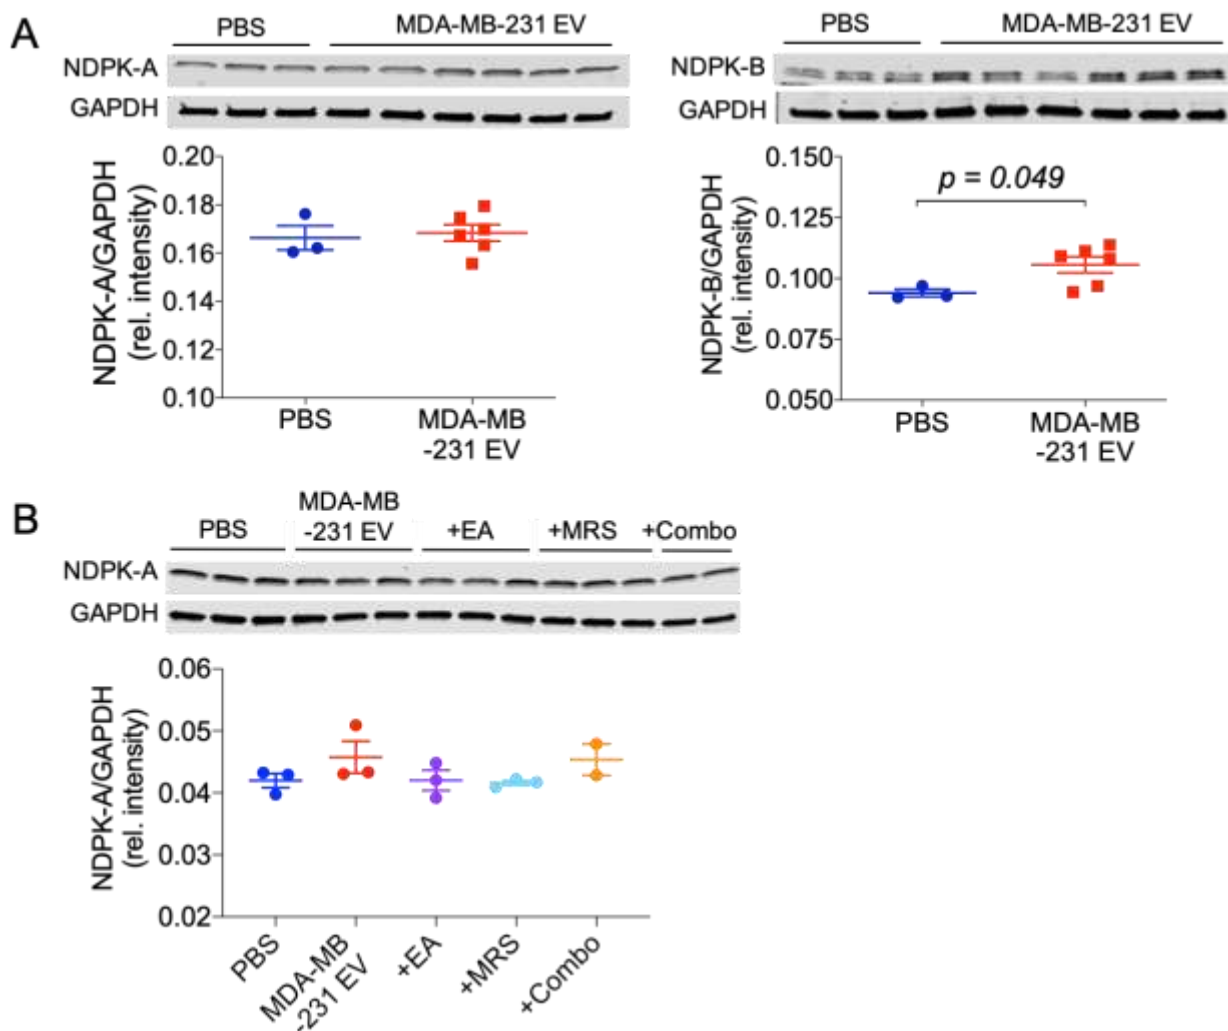

**Supplementary Figure S6.** Western blot analysis of NDPK-A and NDPK-B expression in MDA-MB-231 EV treated mouse lungs. (A) NDPK-A and NDPK-B expression in lung lysates of mice treated for three weeks with PBS (n = 3) or MDA-MB-231 EVs (n = 6). Quantitation of integrated band density shown in associated scatter plots;  $p < 0.05$  by unpaired Student's T-test. (B) NDPK-A expression in lung lysates of mice treated for eight weeks with the indicated treatments. Following eight weeks of treatment, mice were injected by tail vein with MDA-MB-231-Luc<sup>+</sup> cells and lungs were evaluated 30 days following injection (n = 3).

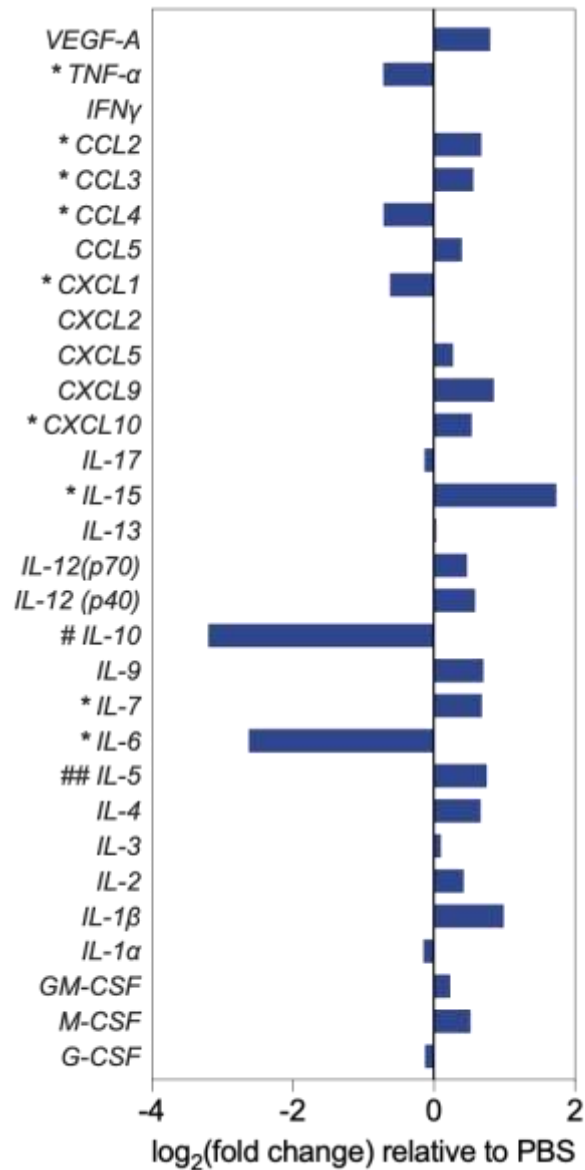

**Supplementary Figure S7.** Prolonged MDA-MB-231 EV exposure induces opposing actions on systemic cytokine production. Circulating cytokines were evaluated in the sera of SCID mice that were treated for eight weeks with MDA-MB-231 EVs or PBS vehicle. n = 4 per group; \* =  $p < 0.05$ , # =  $p = 0.05$ , ## =  $p = 0.06$  by unpaired Student's t-test. Values reflect means of log<sub>2</sub>(fold change) relative to PBS control group.

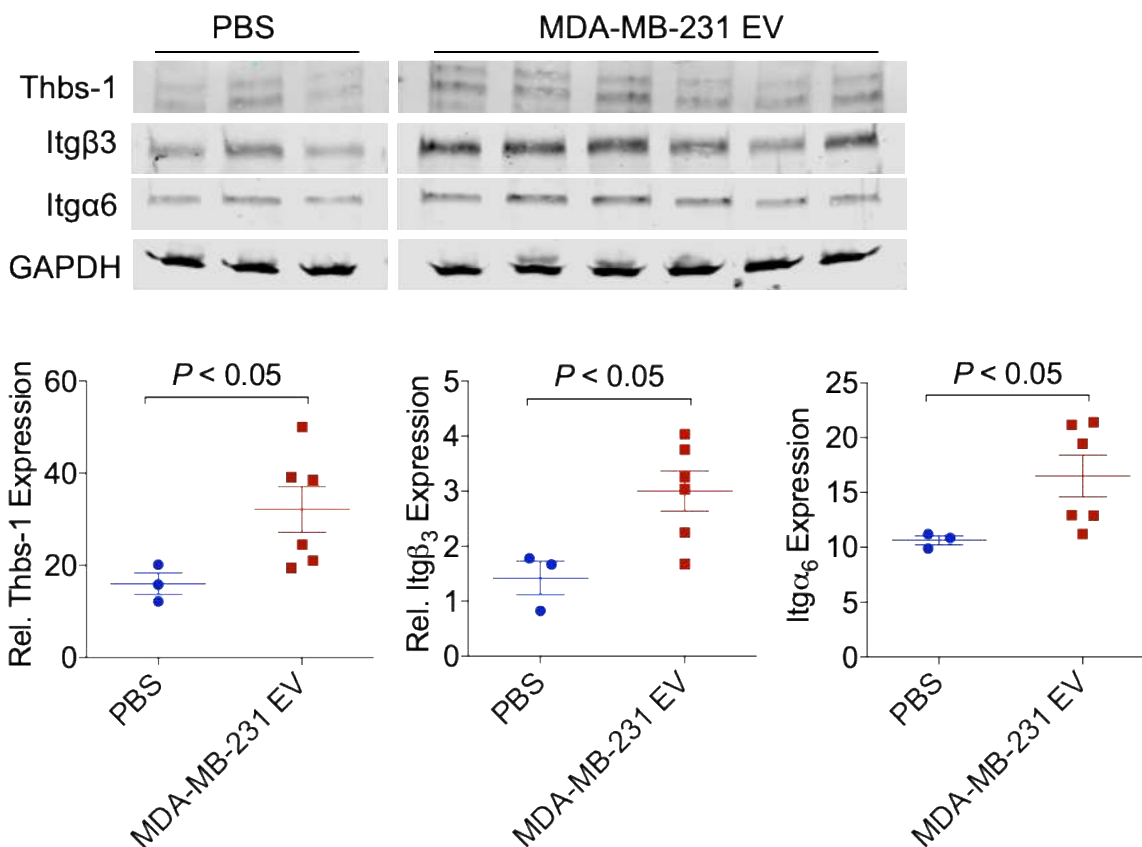

**Supplementary Figure S8.** Validation of mass spectrometry analysis by western blot of select differentially upregulated proteins in lungs of MDA-MB-231 EV-treated mice. NCr/SCID mice were injected by tail vein three times a week for three weeks with PBS vehicle or MDA-MB-231 EVs (10  $\mu$ g). Lung lysates were analyzed by western blot for the expression of differentially expressed proteins, as previously identified by mass spectrometry.  $n = 3$ , PBS treated.  $n = 6$ , MDA-MB-231 EV treated. Mean  $\pm$  S.E.M. \* $P < 0.05$  by two-tailed Mann-Whitney test.

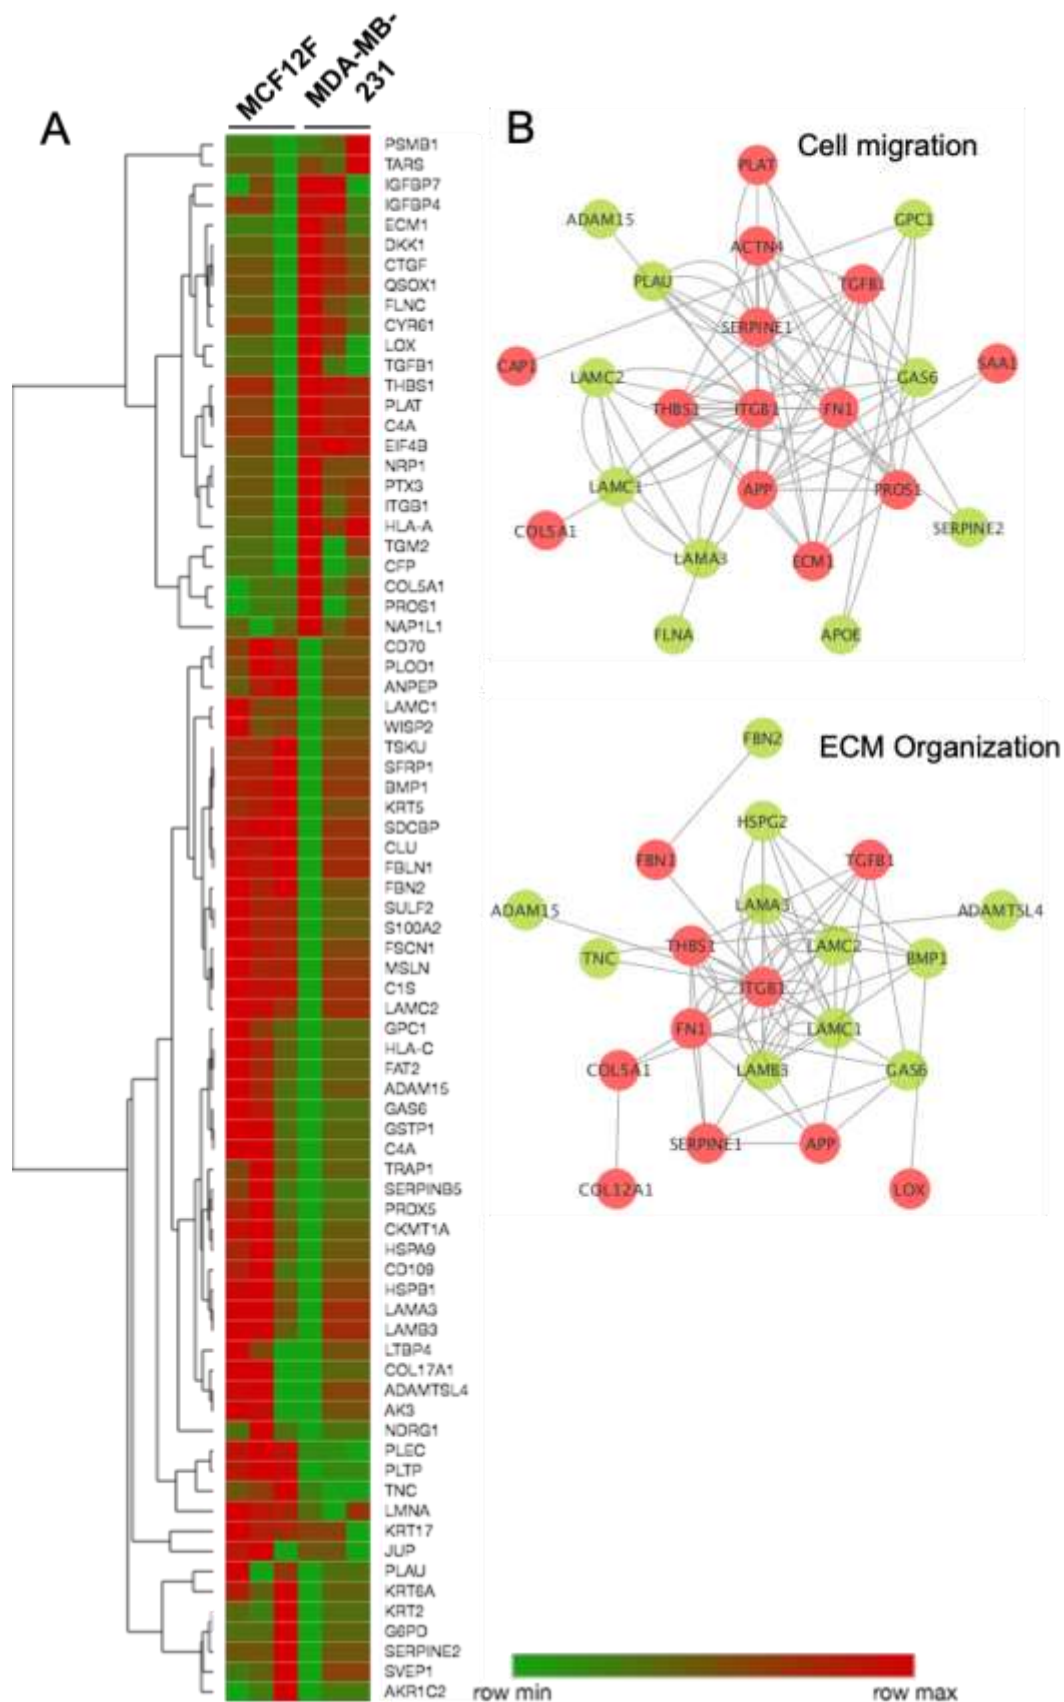

**Supplementary Figure S9.** Proteomic profiling of ExoQuick-TC-isolated MDA-MB-231 EVs reveals malignant features consistent with parent cell line. (A) Heatmap with hierarchical clustering of significant differentially expressed (DE) proteins with over three-fold log<sub>2</sub> expression difference between MDA-MB-231 EVs and MCF-12F EVs. n = 3 per group. (B) Significant DE proteins were mapped to biological processes associated with MDA-MB-231 EVs. Proteins with red nodes denote enrichment in MDA-MB-231 EVs, while green nodes represent proteins significantly upregulated in MCF-12F EVs.

## Supplemental Materials

### Expanded Methodology

*Super-Resolution Microscopy.* For Supplemental Figure 2, EVs were fixed onto fibronectin-coated glass slides in 4% PFA, then blocked in 5% BSA and incubated in 1:100 CPTC-NME2-3 primary antibody overnight (Developmental Studies Hybridoma Bank, Iowa City, IA). Slides were incubated in 1:100 AlexaFluor 680 secondary antibody (Thermo Fisher Scientific) and mounted onto depression slips. Slides were imaged on the Leica GSD super resolution microscope (Leica Microsystems Inc., Buffalo Grove, IL).

*Transmission Electron Microscopy (TEM).* Briefly, EVs were diluted in 2% PFA and adsorbed onto Formvar-carbon coated nickel grids, washed with 50 mM glycine, and blocked with 0.5% bovine serum albumin (BSA). For immunolabeling shown in Supplemental Figure 1, grids were incubated with CD9, CD81, and CD63 antibodies (Biolegend) and secondary antibodies conjugated with 10 nm gold particles (Abcam, Cambridge, MA).

*TMT-labeled Mass Spectrometry.* Samples were processed according to Lundby et al. (2012) and mass tagged using a TMT 10-plex isobaric label kit (Thermo Fisher Scientific). Pooled TMT-labeled peptides were fractionated by basic pH reversed-phase fractionation on an Ultimate 3000 HPLC (Thermo Fisher Scientific). BPRP fractions were separated using an UltiMate 3000 RSLCnano system (Thermo Fisher Scientific). Mass spectral analysis was performed using an Orbitrap Fusion mass spectrometer (Thermo Fisher Scientific). TMT analysis was performed using an MS3 multi-notch approach. Data was analyzed using Sequest (Thermo Fisher Scientific, version v.27, rev. 11.) and Proteome Discoverer (Thermo Fisher Scientific, Version 2.1). A minimum coverage of two peptides was required for positive protein identification.

*Protein Level Data Analysis:* 4,992 proteins with abundance values in all control samples and at least three experimental samples met our criteria for further study. The abundance data of these 4,992 proteins were normalized at the protein level, following the TMT Thermo-Fisher protocol and manual (Thermo Proteome Discoverer User Guide, Version 2.1), using the sum of the abundances of a pool of the nine samples included on the multiplex. Normalized data were log<sub>2</sub>-transformed to follow a normal distribution. Control and experimental abundance values were examined by histogram and quantile (Q-Q) plot to confirm a normal distribution. As each protein was examined as an independent entity and each protein's cohorts included at least three values, the Shapiro-Wilk test was used to test for normality. 208 proteins did not pass the test for normality and were excluded from analyses. Student's t-tests were performed on the normalized data of 4,784 proteins and a correction for the false discovery rate (FDR) was applied.

*Pathway Analysis:* iPathwayGuide (iPG) version 1711 (Advaita Corporation, Plymouth, MI), Ingenuity Pathway Analysis (IPA) (Qiagen, Redwood City, CA), and STRING database version 10.5 (STRING Consortium) were used to identify affected pathways. A cutoff criteria of  $p < 0.05$  with log<sub>2</sub> fold-change  $\geq 0.5$  for differentially expressed proteins was applied. Proteins with known symbols (UNIPROT) and their corresponding expression values were uploaded into each database and protein symbols were mapped to their corresponding genes. For IPA, canonical pathways most significant to the input data set were identified using the IPA library of canonical pathways. Significance was based on two parameters: (1) A ratio of the number of genes from the data set that map to the pathway divided by the total number of genes that map to the canonical pathway and (2) a  $P$  value calculated using Fisher's exact test determining the probability that the association between the genes in the data set and the canonical pathway is due to chance alone. The log<sub>2</sub> normalized expression values of the differentially expressed proteins were mapped using the open source online-tool Morpheus (Broad Institute).

*Experimental Metastasis Study:* For cytokine analysis presented in Supplemental Figure 7, serum from eight-week PBS or MDA-MB-231 EV treated mice was analyzed using CD32 and Angio 5-plex cytokine arrays (Eve Technologies, Calgary, Canada).

*Catalogue of Primary Antibodies and Dilutions:*

| Primary Antibodies      | Cat #     | Conc.<br>mg/ml | Dilution | Clone    | Source         |
|-------------------------|-----------|----------------|----------|----------|----------------|
| CD9                     | 312102    | 0.5            | 1:1000   | HI9a     | Biolegend      |
| CD63                    | cbl553    | 0.1            | 1:250    | RFAC4    | Millipore      |
| CD63                    | 353013    | 1              | 1:1000   | H5C6     | Biolegend      |
| CD81                    | 348501    | 0.5            | 1:1000   | 5A6      | Biolegend      |
| ALIX                    | 634501    | 0.5            | 1:1000   | 3A9      | Biolegend      |
| Flotillin-1             | 849801    | 0.5            | 1:1000   | W16108A  | Biolegend      |
| Calnexin                | 699401    | 0.5            | 1:1000   | W17077   | Biolegend      |
| Tsg101                  | sc-136111 | 0.1            | 1:250    | 51       | Santa Cruz     |
| MFGE8                   | sc-271574 | 0.2            | 1:500    | F-5      | Santa Cruz     |
| PE-mouse IgG1 k isotype | 400113    | 0.2            | 1:100    | MOPC-21  | Biolegend      |
| PE anti-human CD63      | 353003    | 0.1            | 1:100    | H5C6     | Biolegend      |
| PE anti-human NDPK-A    | N7100-66A | 0.1            | 1:100    | -        | US Biologicals |
| Rab anti-human NM23A    | Ab92327   | 0.1            | 1:200    | EPR3036  | Abcam          |
| Rab anti-human NME2     | Ab131329  | 0.1            | 1:200    | EPR8351  | Abcam          |
| PE donkey anti-Rabbit   | 406421    | 0.2            | 1:200    | Poly4064 | Biolegend      |
| Rabbit IgG isotype      | Ab172730  | 0.1            | 1:200    | EPR25A   | Abcam          |
| CPTC-NME1-5             | -         | 0.03           | 1:1000   | -        | DSHB           |
| CPTC-NME2-1             | -         | 0.47           | 1:1000   | -        | DSHB           |
| Firefly Luciferase      | Ab21176   | 11.7           | 1:1000   | -        | Abcam          |
| Thrombospondin-1        | Ab85762   | 1              | 1:1000   | -        | Abcam          |
| GAPDH                   | D16H11    | -              | 1:1000   | 5174     | CST            |
| COX-1                   | 4841S     | -              | 1:1000   | 9896     | CST            |
| COX-2                   | 4842S     | -              | 1:1000   | 12282    | CST            |
| NOS2 (iNOS)             | SC-650    | 0.2            | 1:1000   | M-19     | Santa Cruz     |
| NOS3 (eNOS)             | SC654     | 0.2            | 1:1000   | C-20     | Santa Cruz     |
| ICAM-1 (CD54)           | 116102    | 0.5            | 1:250    | YN1      | Biolegend      |
| ICAM-2 (CD102)          | 105601    | 0.5            | 1:250    | 3C4      | Biolegend      |
| VCAM-1 (CD106)          | 105702    | 0.5            | 1:250    | 429      | Biolegend      |
| ZO-1                    | D7D12     | -              | 1:250    | 8193     | CST            |
| $\beta$ -catenin        | D10A8     | -              | 1:250    | 8480     | CST            |
| Integrin $\beta$ 3      | SC-6627   | 0.2            | 1:1000   | N-20     | CST            |
| GAPDH                   | SC-47724  | 0.2            | 1:1000   | 0411     | Santa Cruz     |
